# Supplementary material for: Imidazole-based phosphane gold(I) complexes as potential agents for cancer treatment: Synthesis, structural studies and antitumour activity
Source: Royal Society of Chemistry journal article supplement (doi:10.1039/b902748c), 2009-01-01
Supplement: b902748c.pdf [file b902748c.pdf]

Supporting Information for

## Imidazole-based phosphane gold(I) complexes as potential agents for cancer treatment: Synthesis, structural studies and antitumor activity

Peter C. Kunz,\* Matthias U. Kassack, Alexandra Hamacher and Bernhard Spingler

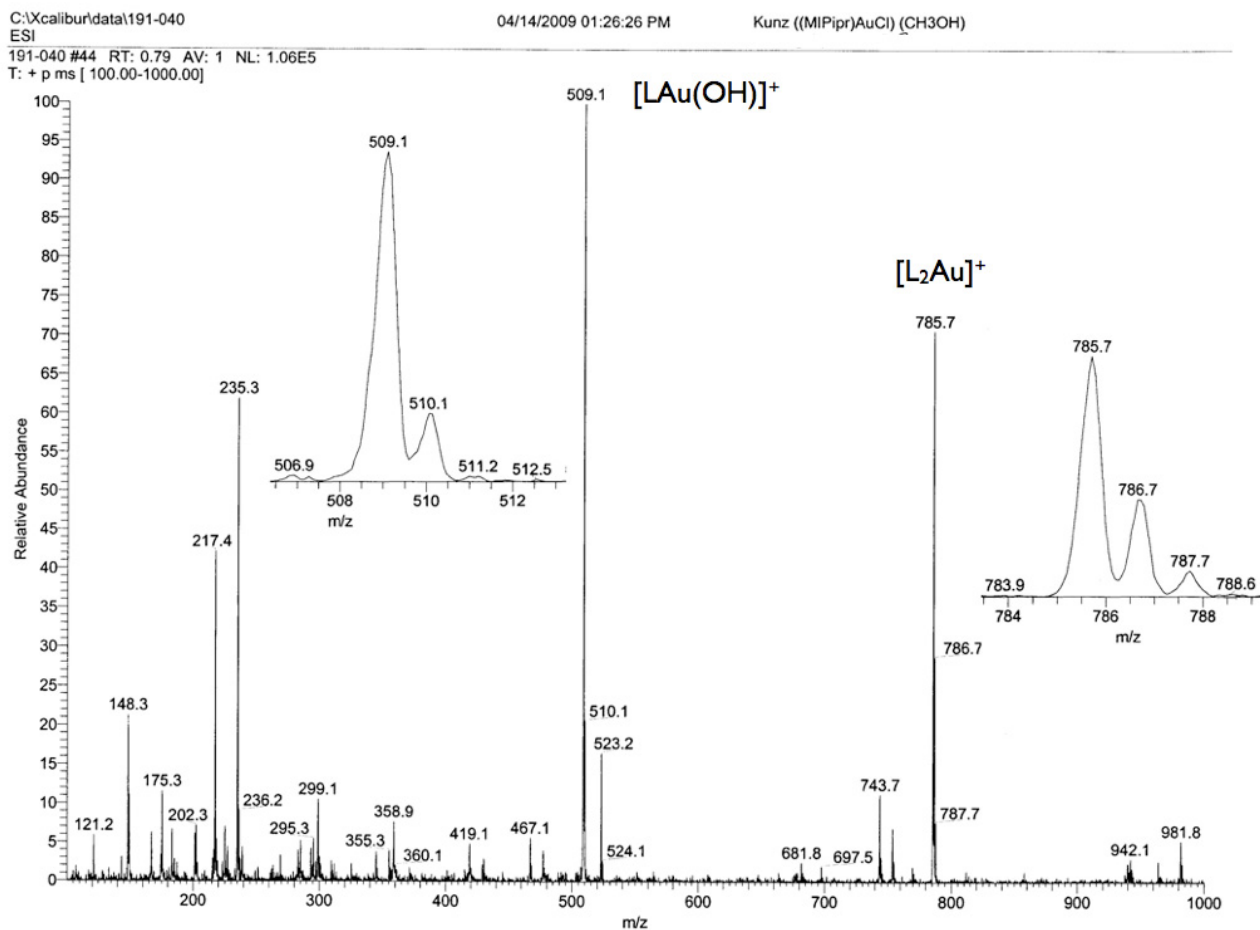

Fig. S11 ESI mass spectrum of **4** in methanol.

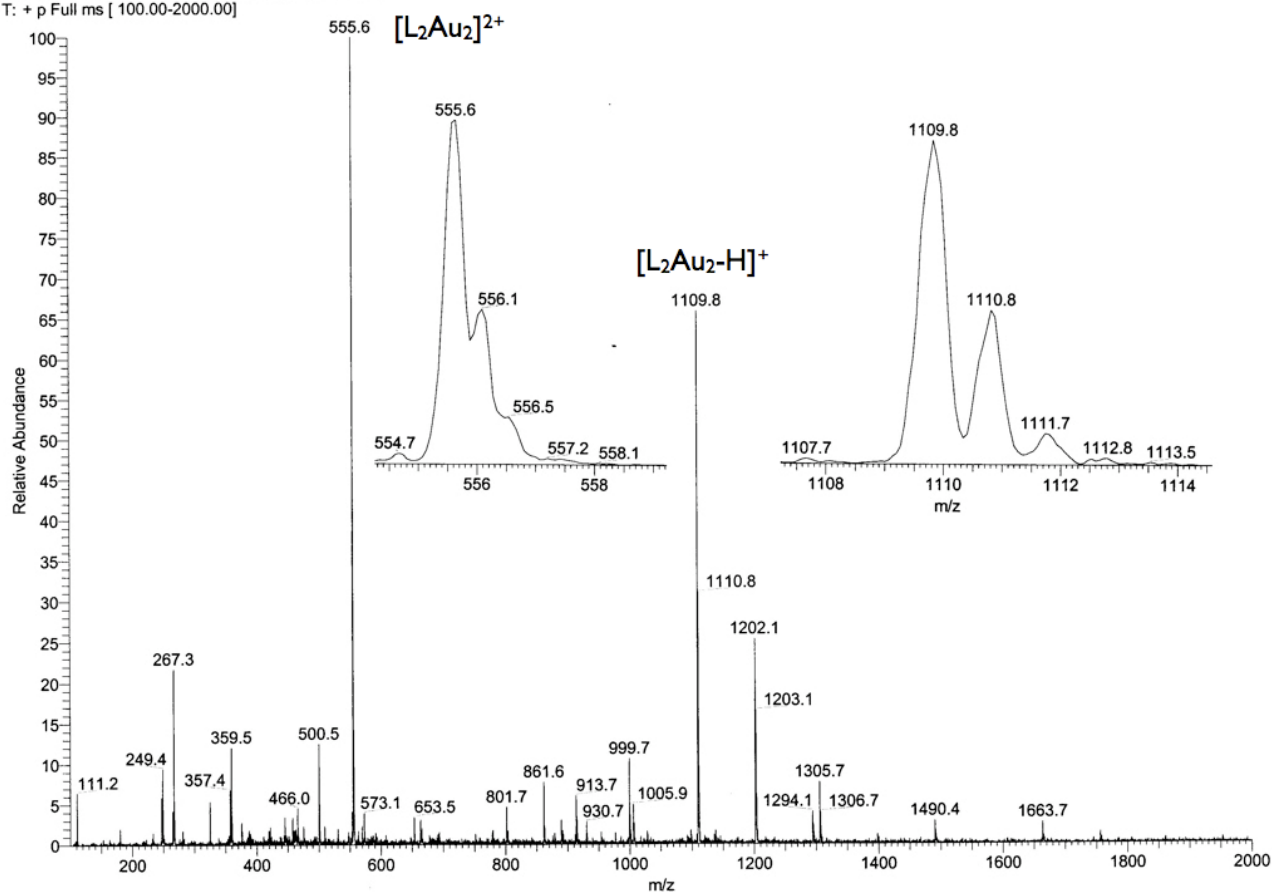

Fig. S12 ESI mass spectrum of 5 in methanol.

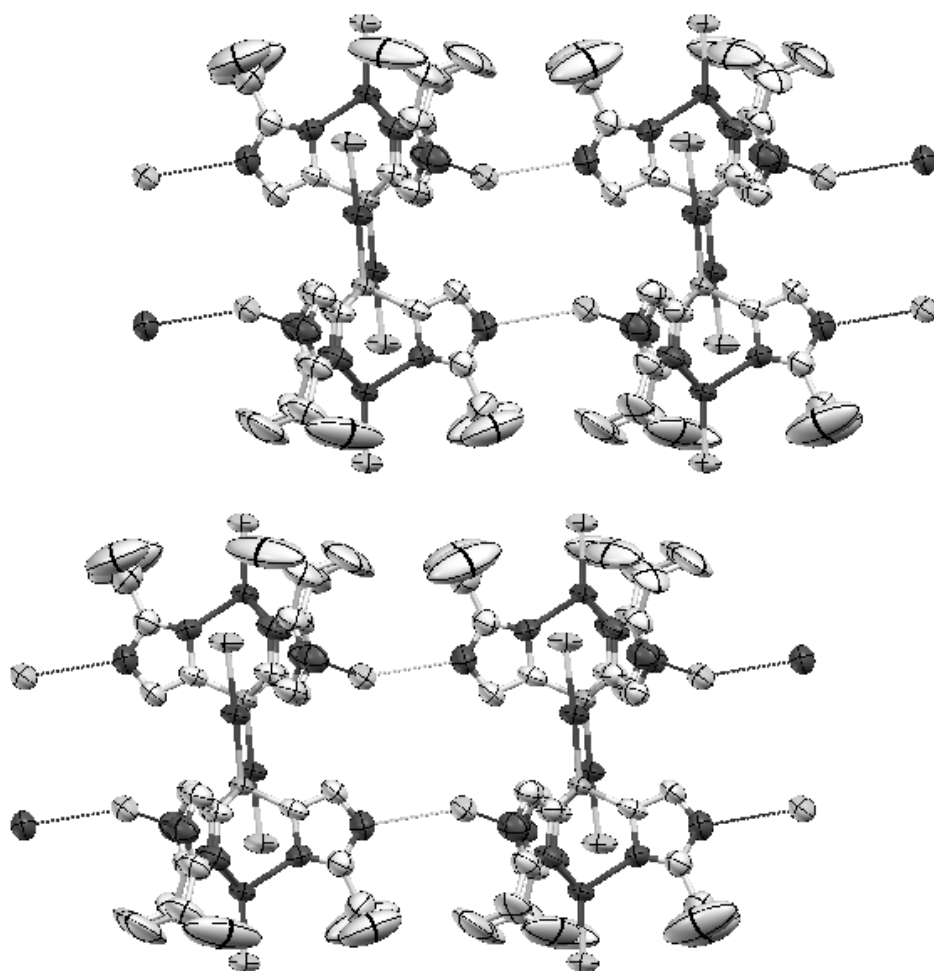

**Fig. SI3** Packing in the solid-state structure of **6**. View along the crystallographic *b*-axis. The displacement ellipsoids are drawn at a 50 % level, H-atoms are omitted for clarity.

**Table SI1** Relative potency of compounds **1** - **5** compared to cisplatin. Ratios of  $IC_{50}$  (cisplatin) and  $IC_{50}$  (test compound) were calculated for each cell line, respectively. Missing data result from no effects up to 10  $\mu$ M.

|          | Cisplatin | <b>1</b> | <b>2</b> | <b>3</b> | <b>4</b> | <b>5</b> |
|----------|-----------|----------|----------|----------|----------|----------|
| A2780    | 1         | 1.50     | 0.29     | 0.12     | 0.68     | 0.14     |
| A2780cis | 1         | 8.32     | 1.31     | -        | 1.98     | 0.92     |
| SKOV-3   | 1         | 3.48     | -        | -        | -        | -        |
| HEY      | 1         | 4.20     | 0.69     | 0.30     | 0.89     | 0.33     |
| OVCAR-3  | 1         | 3.41     | 0.84     | -        | 0.86     | -        |
| OVCAR-8  | 1         | 2.85     | 0.85     | 0.91     | 0.75     | 0.59     |
| BG-1     | 1         | 3.24     | 0.61     | 0.38     | 1.23     | 0.41     |
| HL60     | 1         | 0.37     | 0.14     | 0.09     | 3.16     | 0.09     |
| K562     | 1         | 5.08     | 1.61     | 1.18     | 1.49     | 0.83     |
